# Supplementary figures and images for: Behavioral Responses of Bemisia tabaci Mediterranean Cryptic Species to Three Host Plants and Their Volatiles
Source: MDPI journal article supplement (doi:10.3390/insects13080703), 2022-08-05

Figure S1. Qualitative Analysis of Three Plant Volatiles in Different Periods

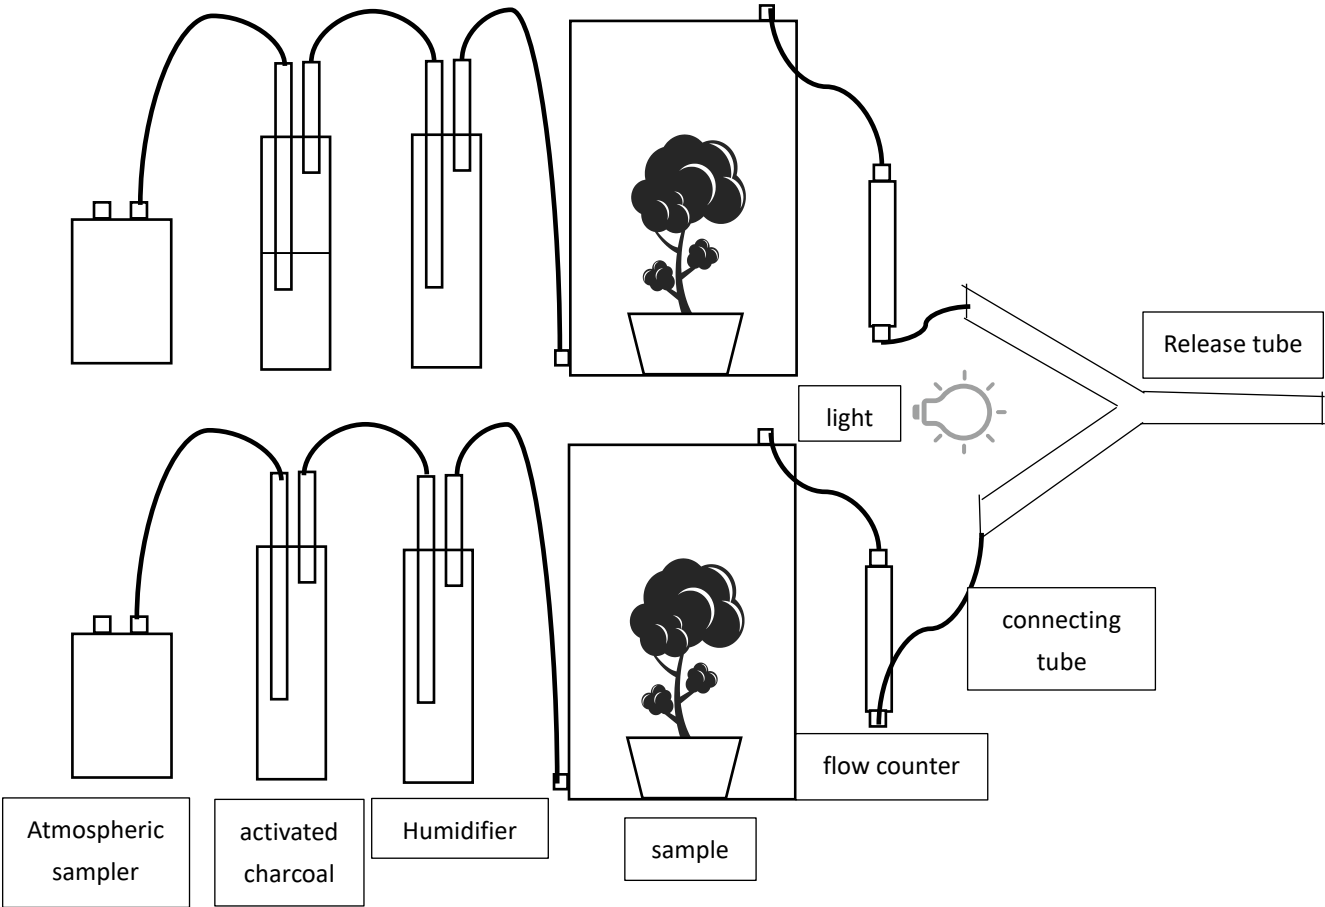

Supplement: s1 [file s1]
